# Supplementary material
Source: HighWire-hosted journal article supplement (https://bmjopenrespres.bmj.com/content/suppl/2023/11/15/10.1.e001723)
Supplement: bmjresp-2023-001723supp001_data_supplement.pdf [file bmjresp-2023-001723supp001_data_supplement.pdf]

### Supplementary Appendix One: Interview Schedule

- Ensure patient confidentiality (private room, minimize interruptions)
- Introduction. Note that interview will be recorded, and all data will be confidential
  
- I understand that XXX (child) was admitted to hospital with asthma.
- What prompted you to bring your child to the emergency department?
  - What was your main concern?
  
- Have you been to hospital for asthma before?
  - How was this time any different from your previous experiences?
  
- Which part of XXX's hospital admission was most worrying for you? (*e.g. ambulance, on way to hospital, in emergency department, in ICU, on the ward*)
  - [if patient went to ICU]
    - *What was it like when you were told XXX needed to go to intensive care?*
    - *What was your experience of intensive care?*
  
- What was the communication like during your hospital stay?
  - What did the doctors and nurses explain to you about the treatment that was being provided to your child?
  - Did you feel confident to ask the health care team questions about your child's condition?
  
- What do you know now that you didn't know prior to coming to hospital?
  
- What do you think are the most important aspects of care and treatment that doctors and nurses should focus on?
  
- As a parent, what would you consider to be the most important to parents / families if their child was in a similar situation?

- What treatment do you consider to be the most effective for XXX when they are really unwell?
- Based on your experience this time, is there anything that you would want to happen differently if you were in the same situation again?
- What treatment options that you have experienced do you prefer for child? E.g. avoiding IV therapy, non-invasive ventilation, something different/new?
- What information were you given for discharge home? Did you feel you were provided with enough education to manage asthma at home?
- If we were doing research looking at a new or different treatment for children with a bad attack of asthma, what do you think are the most important things for us to look at?
  - If we were going to introduce a new treatment, how do you think we could tell it was doing a good job? [*Explanation (if needed) – examples of process outcomes (time to treatment, communication), clinical outcomes (change in symptoms) and psychological outcomes (reassurance)*]. Why are these things important?
- Conclude interview. Check for any missing concepts, anything else the interviewee would like to say.
- Questions regarding involvement in later follow-up work.
- Thank participant.

Date of interview    \_ / \_ / \_

Setting:              Ward              Intensive care              Outpatients

Language interview conducted in: \_\_\_\_\_

Who was interviewed:

Mother

Father

Sibling

Child

Uncle

Aunt

Other (specify) \_\_\_\_\_

### Supplementary Appendix Two: Data Collection Form

Verbal consent obtained?          Yes          No

Patient age:                            \_\_\_

Patient DOB:                          \_\_ / \_\_ / \_\_\_

Interview number:                    \_\_\_\_\_

Age asthma was first diagnosed:   \_\_\_\_\_

Number of previous hospital attendances with asthma / wheeze:        \_\_\_\_\_

Number of previous hospital admissions with asthma / wheeze:        \_\_\_\_\_

Number of previous ICU admissions with asthma / wheeze:                \_\_\_\_\_

Family history of asthma / wheeze:      Mother      Yes      No

                                                                    Father      Yes      No

                                                                    Siblings    Yes      No

                                                                    Other      Yes      No

Usual asthma medications:

\_\_\_\_\_

#### **This hospital admission:**

Date of arrival        \_\_ / \_\_ / \_\_\_                            Date of discharge \_\_ / \_\_ / \_\_\_

Hospital length of stay (hours) \_\_\_\_\_

Presented by ambulance?            No      Yes

Given IV bronchodilator?            No      Yes

        Magnesium?                        No      Yes

        Aminophylline?                    No      Yes

        Terbutaline?                        No      Yes

        Salbutamol?                         No      Yes

        Other?                                No      Yes (specify medications): \_\_\_\_\_

Given IV corticosteroid?            No      Yes (specify medications): \_\_\_\_\_

Given nebulised magnesium?            No      Yes

Given non-invasive ventilation?      No      Yes

Given High-flow nasal oxygen?      No      Yes

|                  |    |     |
|------------------|----|-----|
| Admitted to ICU? | No | Yes |
| Intubated?       | No | Yes |

### Supplementary Appendix Three: Clinical characteristic of included children, by country<sup>2</sup>

| Country, n                                              | Paraguay<br>21 | Argentina<br>6 | Costa<br>Rica<br>5 | China<br>4 | USA<br>4 | Australia<br>3 |
|---------------------------------------------------------|----------------|----------------|--------------------|------------|----------|----------------|
| Age in years (median)                                   | 6              | 7              | 8                  | 4.5        | 8        | 7              |
| Previous ED attendances with asthma (median)            | 4              | 4              | 2                  | 3          | 1.5      | 3              |
| Number of previous hospital admissions (median)         | 1              | 2              | 2                  | 2          | 4.5      | 3              |
| Number of children with previous ICU admission (n,%)    | 1 (5)          | 0 (0)          | 1 (20)             | 0 (0)      | 2 (50)   | 2 (67)         |
| Family history of asthma in first degree relative (n,%) | 12 (57)        | 3 (50)         | 3 (60)             | 4 (100)    | 2 (50)   | 1 (33)         |
| Usual treatment for asthma                              |                |                |                    |            |          |                |
| Inhaled short-acting beta-agonist (n,%)                 | (0)            | 6 (100)        | 3 (60)             | 3 (75)     | 2 (50)   | 2 (67)         |
| Inhaled corticosteroid (n,%)                            | 6 (29)         | 4 (67)         | 3 (60)             | 4 (100)    | 2 (50)   | 1 (33)         |
| Montelukast (n,%)                                       | (0)            | (0)            | (0)                | 1 (25)     | 2 (50)   | (0)            |
| LABA / steroid combined inhaler (n,%)                   | 2 (10)         | 1 (17)         | (0)                | 1 (25)     | (0)      | (0)            |
| No usual medications for asthma (n,%)                   | (0)            | (0)            | (0)                | (0)        | (0)      | (0)            |
| Arrived by ambulance (n,%)                              | (0)            | (0)            | (0)                | (0)        | 2 (50)   | (0)            |
| Length of stay in hospital (hours) (median)             | 27 ()          | 22.5 ()        | 107 ()             | 192 ()     | 16.5 ()  | 85 ()          |
| Treatment while in hospital                             |                |                |                    |            |          |                |
| Intravenous corticosteroids (n,%)                       | 17 (81)        | (0)            | 4 (80)             | (0)        | 2 (50)   | 2 (67)         |
| Intravenous bronchodilator (n,%)                        | (0)            | (0)            | (0)                | (0)        | (0)      | (0)            |
| Magnesium (n,%)                                         | 4 (19)         | (0)            | 4 (80)             | (0)        | 4 (100)  | 2 (67)         |
| Aminophylline (n,%)                                     | (0)            | (0)            | 2 (40)             | 3 (75)     | (0)      | 1 (33)         |
| Salbutamol (n,%)                                        | (0)            | (0)            | 4 (80)             | 4 (100)    | (0)      | 1 (33)         |
| Ipratropium bromide (n,%)                               | (0)            | (0)            | (0)                | (0)        | (0)      | (0)            |
| High-flow oxygen therapy (n,%)                          | (0)            | (0)            | (0)                | (0)        | (0)      | (0)            |
| Intravenous antibiotics (n,%)                           | (0)            | (0)            | (0)                | (0)        | 4 (100)  | (0)            |
| Non-invasive ventilation (n,%)                          | (0)            | (0)            | (0)                | 1 (25)     | (0)      | 1 (33)         |
| Nebulised magnesium (n,%)                               | (0)            | (0)            | (0)                | 1 (25)     | (0)      | (0)            |
| ICU / HDU admission (n,%)                               | (0)            | (0)            | (0)                | 1 (25)     | (0)      | 2 (67)         |

| Country, n                                       | Singapore<br>3 | Canada<br>2 | Nigeria<br>2 | United<br>Kingdom<br>2 | Spain<br>1 | Qatar<br>1 |
|--------------------------------------------------|----------------|-------------|--------------|------------------------|------------|------------|
| Age in years (median)                            | 4              | 8           | 3            | 8                      | 9          | 5          |
| Previous ED attendances with asthma (median)     | 5              | 5           | 2            | 5                      | 3          | 5          |
| Previous hospital admissions (median)            | 5              | 1           | 2            | 2.5                    | 1          | 1          |
| Previous ICU admission (n,%)                     | 1 (33)         | 0 (0)       | 0 (0)        | 0 (0)                  | 1 (100)    | 0 (0)      |
| History of asthma in first degree relative (n,%) | (0)            | 1 (50)      | 1 (50)       | 1 (50)                 | (0)        | (0)        |
| Usual treatment for asthma                       |                |             |              |                        |            |            |
| Inhaled short-acting beta-agonist (n,%)          | 3 (100)        | (0)         | 2 (100)      | 1 (50)                 | 1 (100)    | 1 (100)    |
| Inhaled corticosteroid (n,%)                     | 3 (100)        | (0)         | (0)          | 1 (50)                 | 1 (100)    | 1 (100)    |
| Montelukast (n,%)                                | 3 (100)        | (0)         | (0)          | (0)                    | (0)        | 1 (100)    |
| LABA / steroid combined inhaler (n,%)            | 1 (33)         | (0)         | (0)          | (0)                    | (0)        | (0)        |
| No usual medications for asthma (n,%)            | (0)            | (0)         | (0)          | (0)                    | (0)        | (0)        |
| Arrived by ambulance (n,%)                       | (0)            | (0)         | (0)          | (0)                    | (0)        | (0)        |
| Length of stay in hospital (hours) (median)      | 37 ()          | 72 ()       | 85 ()        | 73 ()                  | 48 ()      | 5 ()       |
| Treatment while in hospital                      |                |             |              |                        |            |            |
| Intravenous corticosteroids (n,%)                | 2 (67)         | 1 (50)      | (0)          | 2 (100)                | 1 (100)    | (0)        |
| Intravenous bronchodilator (n,%)                 | (0)            | (0)         | (0)          | (0)                    | (0)        | (0)        |
| Magnesium (n,%)                                  | 1 (33)         | 1 (50)      | (0)          | 2 (100)                | 1 (100)    | (0)        |
| Aminophylline (n,%)                              | 1 (33)         | (0)         | (0)          | 2 (100)                | (0)        | (0)        |
| Salbutamol (n,%)                                 | 2 (67)         | (0)         | (0)          | 2 (100)                | 1 (100)    | (0)        |
| Ipratropium bromide (n,%)                        | (0)            | (0)         | (0)          | (0)                    | (0)        | (0)        |
| High-flow oxygen therapy (n,%)                   | (0)            | (0)         | (0)          | (0)                    | (0)        | (0)        |
| Intravenous antibiotics (n,%)                    | (0)            | (0)         | (0)          | (0)                    | (0)        | (0)        |
| Non-invasive ventilation (n,%)                   | 1 (33)         | (0)         | (0)          | (0)                    | (0)        | (0)        |
| Nebulised magnesium (n,%)                        | (0)            | (0)         | (0)          | (0)                    | (0)        | (0)        |
| ICU / HDU admission (n,%)                        | (0)            | (0)         | (0)          | (0)                    | (0)        | (0)        |

Supplementary Appendix Four: Comparison of themes identified in interviews from Paraguay (n=21) and those from all other countries (n=33).

|                                                                                              | Identified in Paraguay interviews | Identified in other interviews |
|----------------------------------------------------------------------------------------------|-----------------------------------|--------------------------------|
| Decision to seek hospital care                                                               | Yes                               | Yes                            |
| Transit to hospital                                                                          | Yes                               | Yes                            |
| Costs of care                                                                                | Yes                               | Yes                            |
| Waiting times                                                                                | Yes                               | Yes                            |
| Readiness for discharge and length of stay                                                   |                                   | Yes                            |
| Intravenous treatment is a “step up” but is also a distressing experience                    | Yes                               | Yes                            |
| Intensive care unit / high-dependency unit admission                                         | Yes                               | Yes                            |
| Effective communication and frequent reassessment is associated with satisfaction with care. | Yes                               | Yes                            |
| Work of breathing                                                                            | Yes                               | Yes                            |
| Length of stay and speed of recovery                                                         | Yes                               | Yes                            |
| Side effects of treatment                                                                    | Yes                               | Yes                            |
| Satisfaction with treatment                                                                  |                                   | Yes                            |
